# Supplementary material
Source: PubMed Central journal article supplement (PMC4842318)

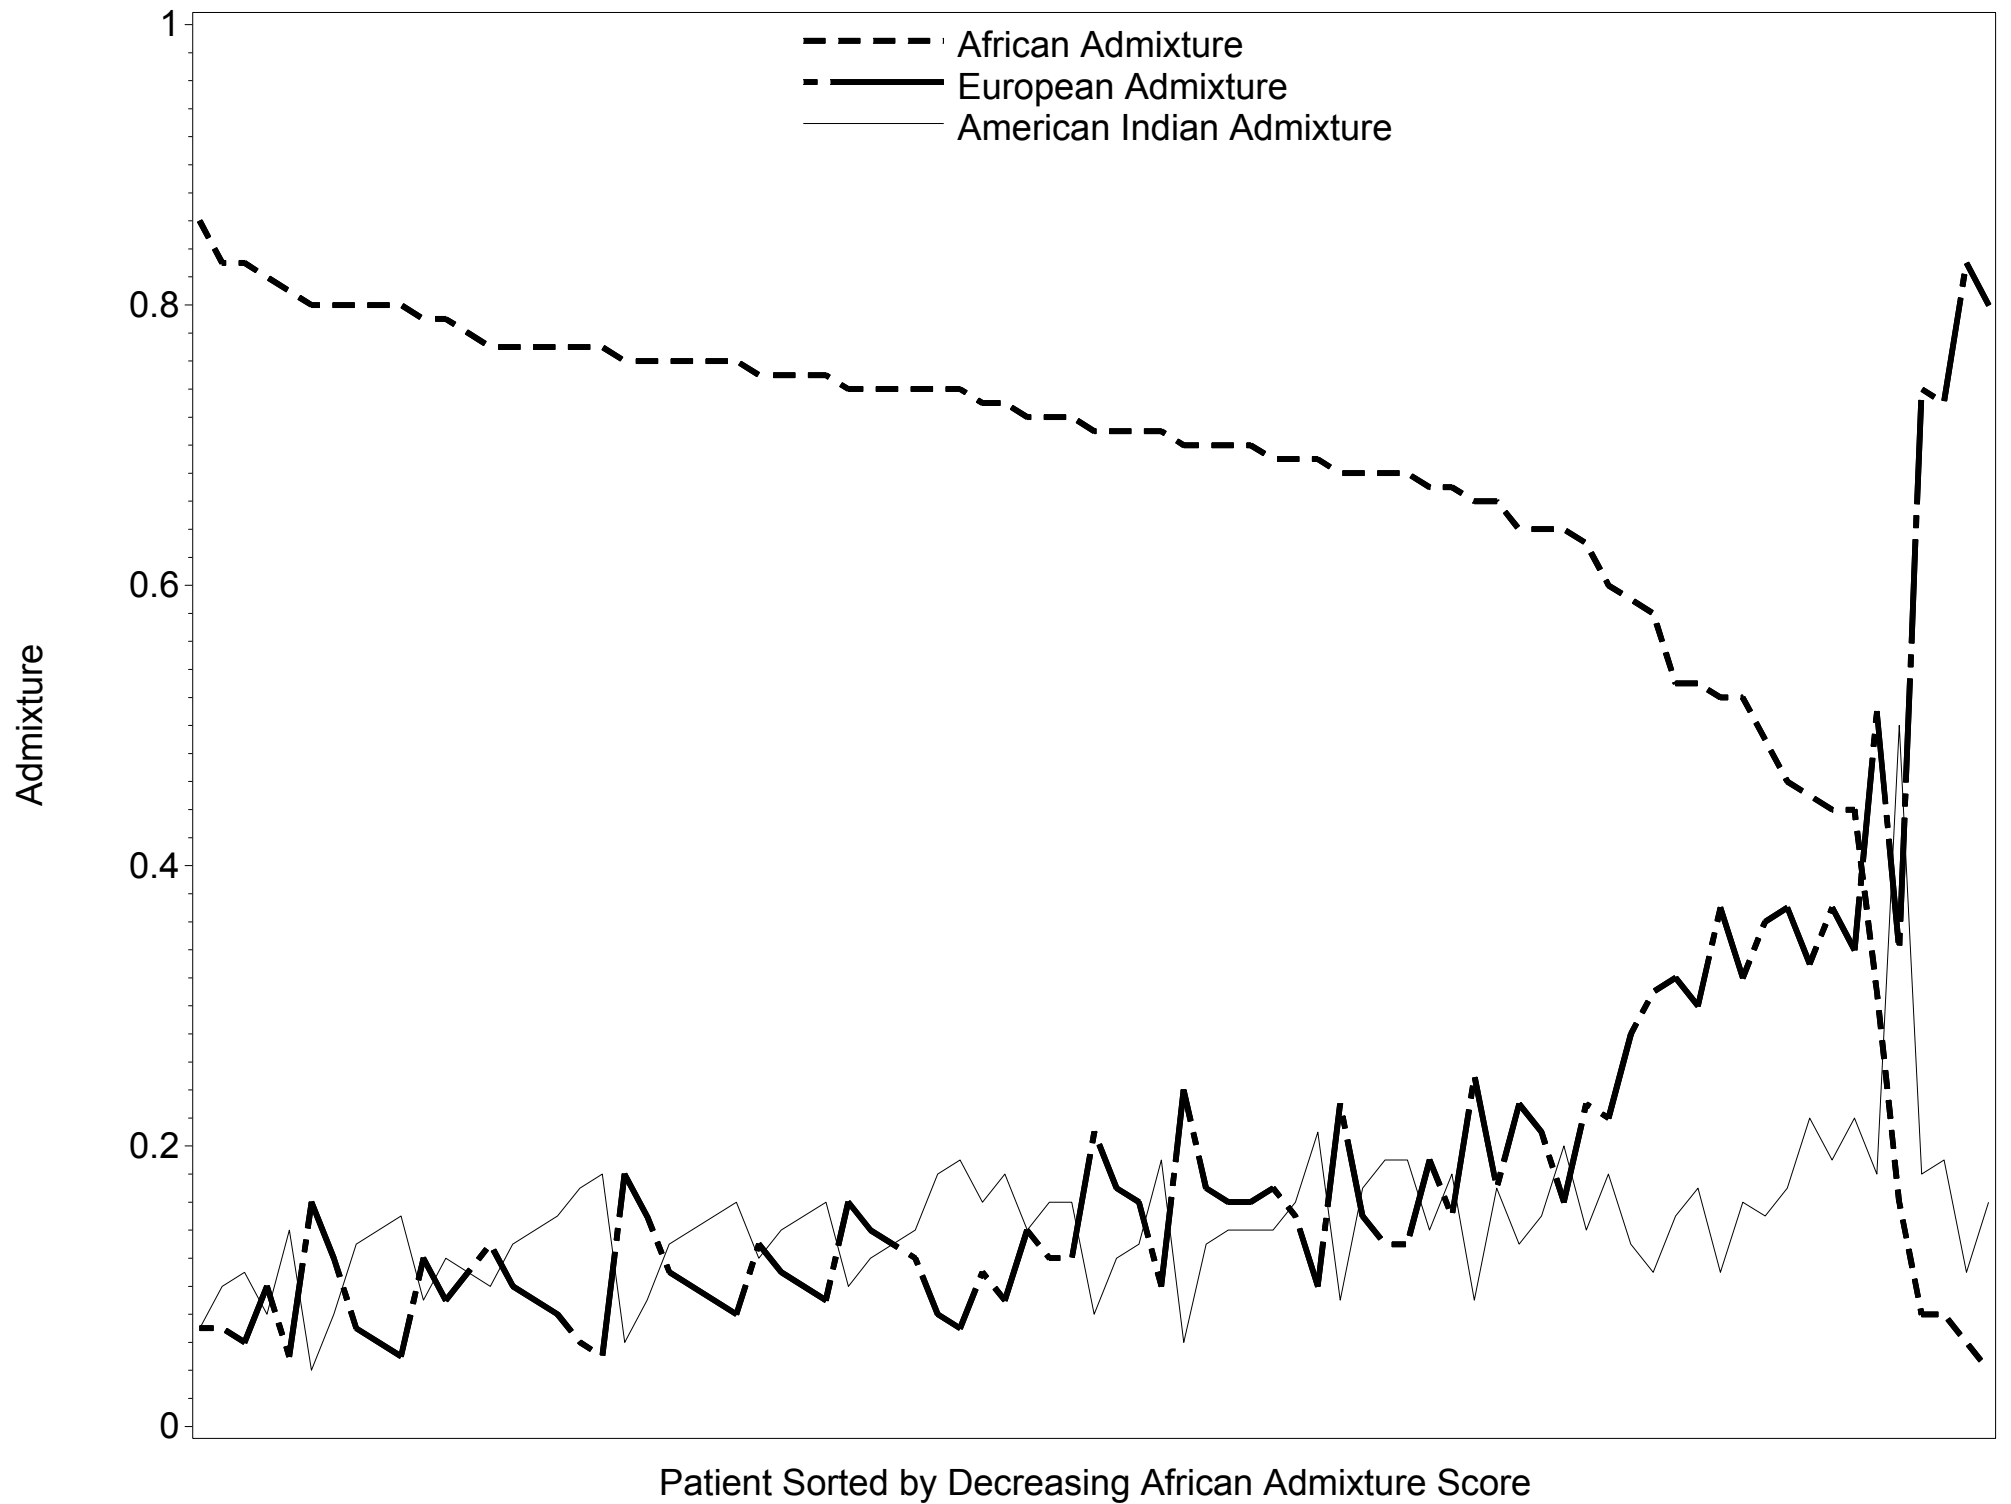

Supplement: NIHMS742941-supplement-Fig_2a_supplemental.pdf [file NIHMS742941-supplement-Fig_2a_supplemental.pdf]

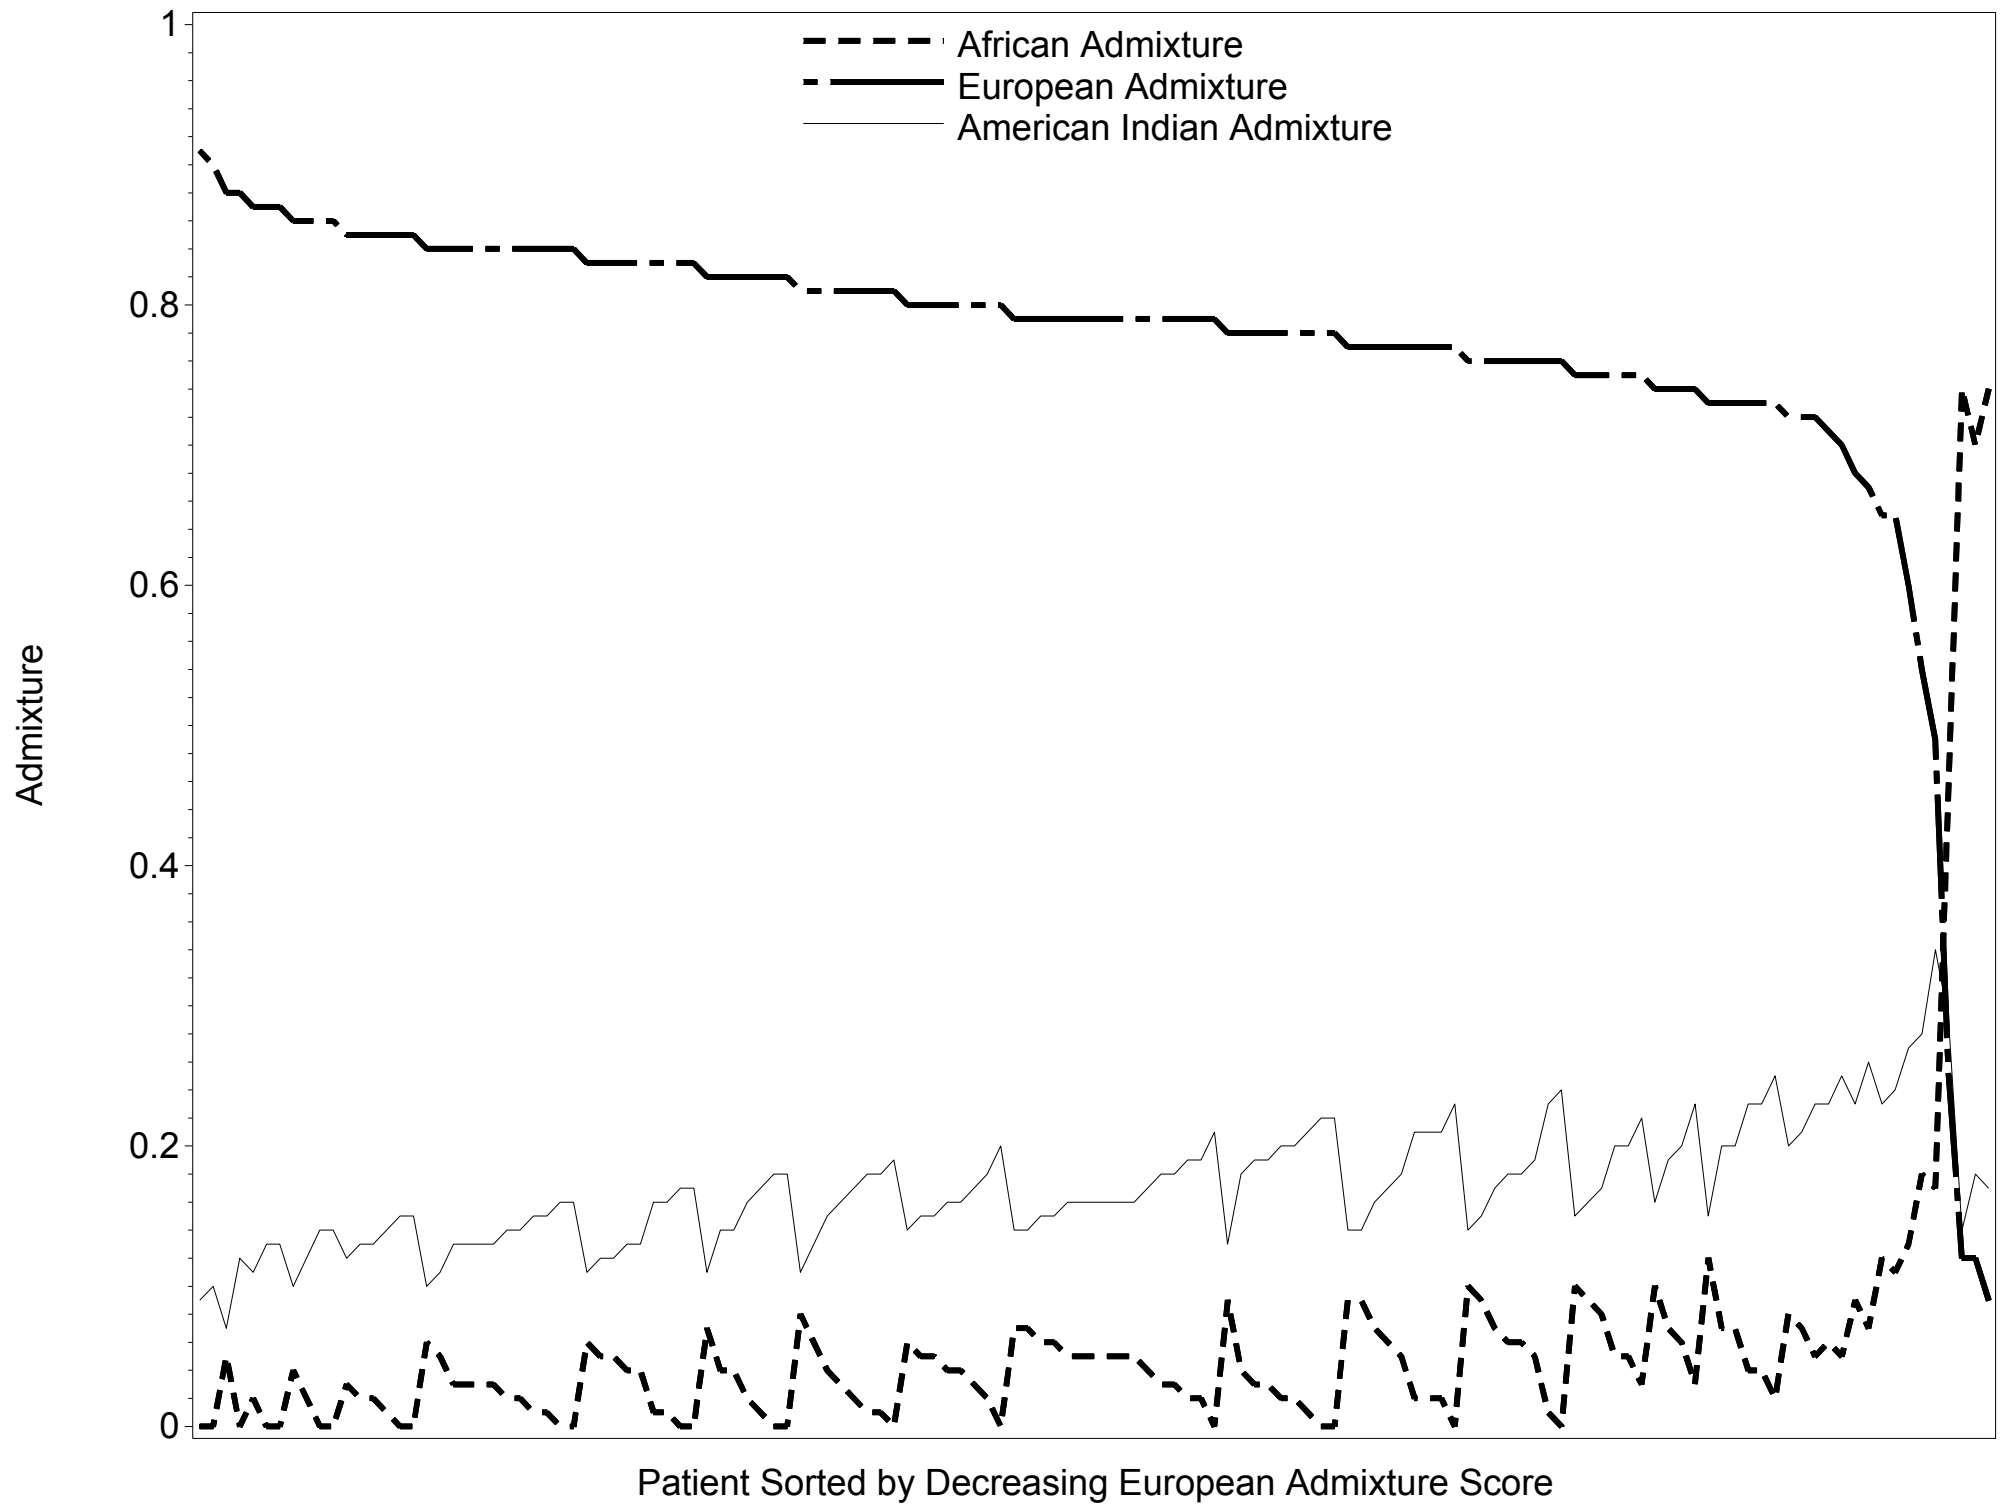

Supplement: NIHMS742941-supplement-Fig_2b_supplemental.pdf [file NIHMS742941-supplement-Fig_2b_supplemental.pdf]
